# Supplementary figures and images for: Enhanced High-Temperature Oxidation Resistance of Mg-Gd-Zn-Zr Alloy via YSZ Thermal Barrier Coating with a Plasma Electrolytic Oxidation Bond Layer
Source: Research Square preprint supplement (doi:10.21203/rs.3.rs-7136434/v1), 2025-07-24

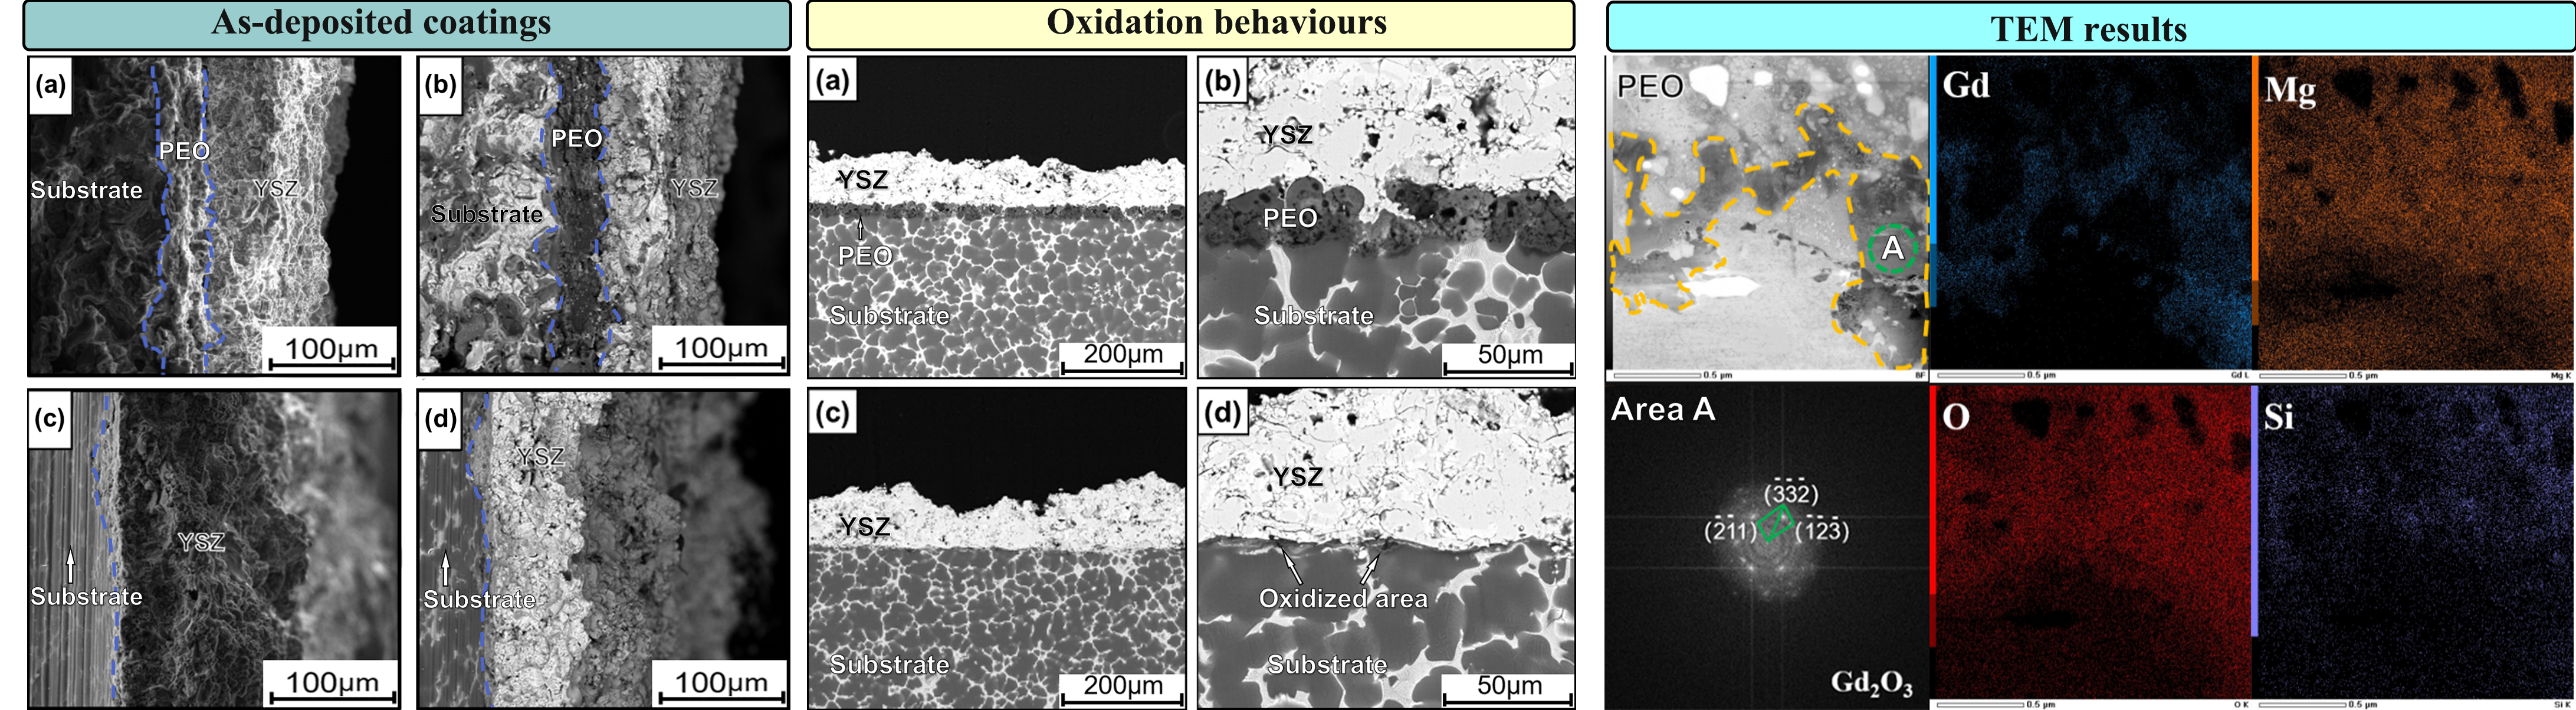

Supplement: Supplementary file 1 [file 8261d6c870ad2663d1f19a43.docx]
